# Supplementary material
Source: Springer Nature journal article supplement (https://www.springermedizin.de/resource/supplementary/12947_2012_424_MOESM4_ESM.pdf/9555732)

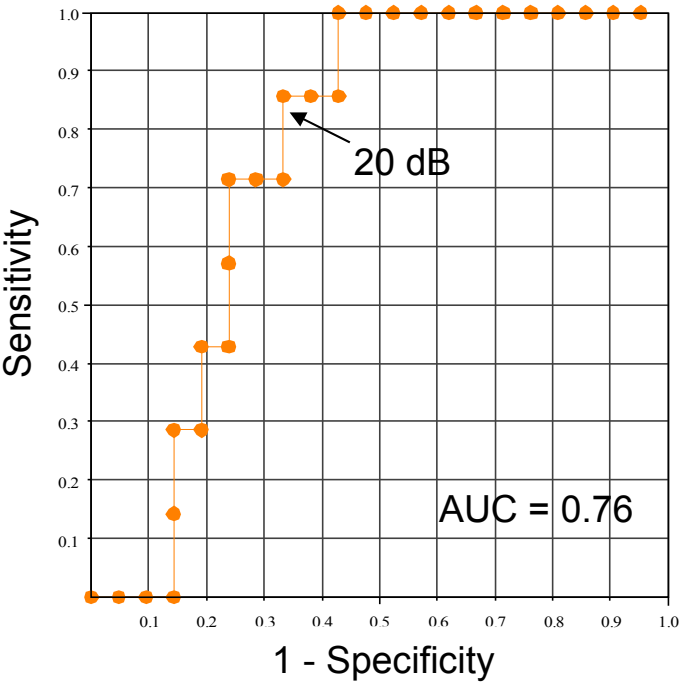

Supplement: MOESM4 [file 9555732]
